# Supplementary material for: Two new transition metal–organic frameworks as multiresponsive fluorescence sensors for detecting Fe3+, Cr2O72− and TNP
Source: Royal Society of Chemistry journal article supplement (doi:10.1039/d2nj03746g), 2022-01-01
Supplement: d2nj03746g1.pdf [file d2nj03746g1.pdf]

## Supporting Information

### Two new transition metal-organic frameworks as multiresponsive fluorescence sensors for detecting $\text{Fe}^{3+}$ , $\text{Cr}_2\text{O}_7^{2-}$ and TNP

Jun-Jun Li,<sup>a,b</sup> Zhen-Jie Feng,<sup>a,b</sup> Xue-Song Wu,<sup>\*a,b</sup> Ying-Li,<sup>a,b</sup> Di Wu,<sup>a,b</sup>  
Jing Sun,<sup>\*a,b</sup> Xin-Long Wang<sup>a,c</sup> and Zhong-Min Su<sup>\*a,b,d</sup>

<sup>a</sup> Jilin Provincial Science and Technology Innovation Center of Optical Materials and Chemistry, School of Chemistry and Environmental Engineering, Changchun University of Science and Technology, Changchun, 130022, People's Republic of China

<sup>b</sup> Jilin Provincial International Joint Research Center of Photo-functional Materials and Chemistry, Changchun, 130022, People's Republic of China

<sup>c</sup> National & Local United Engineering Laboratory for Power Battery Institution, Northeast Normal University, Changchun, Jilin, 130024, People's Republic of China

<sup>d</sup> College of Chemistry, Jilin University, Changchun, 130012, People's Republic of China

\*Corresponding Author E-mail: [wxs@cust.edu.cn](mailto:wxs@cust.edu.cn) (X.-S. Wu); [sj-cust@126.com](mailto:sj-cust@126.com) (J. Sun); [zmsu@nenu.edu.cn](mailto:zmsu@nenu.edu.cn) (Z.-M. Su).

### **Chemicals and instrumentations.**

3, 5-bis(imidazole-1-yl)pyridine (Bip) was prepared under laboratory conditions according to references<sup>1</sup>, while other reagents and solvents were obtained commercially and used without further purification. The FT-IR spectra were carried out on a Nicolet Magna 750 FTIR spectrometer using KBr pellets in the range of 4000-400 cm<sup>-1</sup>. The UV-vis absorption spectra were measured and obtained with a Varian Cary 50 spectrophotometer. Thermal gravimetric analysis (TGA) was performed on a EVO2G-TG-08 analyzer in a nitrogen atmosphere with a temperature range of 35-800 °C and a heating rate of 10°C min<sup>-1</sup>. Powder X-ray diffraction (PXRD) patterns were obtained on a Rigaku Smart Lab with Cu-K $\alpha$  ( $\lambda = 1.5418 \text{ \AA}$ ) radiation in the range 5-50°. Solid state fluorescence and all fluorescence sensing experiments were carried out on a F-7000 fluorescence spectrometer.

### **X-ray crystallography.**

The single-crystal X-ray diffraction measurements of all crystals were performed on a Bruker Axs Apex III CCD diffractometer equipped with graphite monochromated Mo-K $\alpha$  radiation ( $\lambda = 0.71073 \text{ \AA}$ ). The data of crystals were collected at room temperature. Multi-scan absorption corrections were applied using the SADABS program. The structure of crystals was solved by direct methods and refined by  $F^2$  full-matrix refinement using the SHELXTL package (SHELXTL-97). The detail single-crystal data of **CUST-751** and **CUST-752** are showed in Table 1. The selected bond lengths ( $\text{\AA}$ ) are presented in Table S1-S2. The CCDC numbers of **CUST-751** and **CUST-752** are 2171855 and 2171856, respectively.

### **Luminescence sensing experiments.**

The whole process of the experiments was manipulated at room temperature. DMF was chosen as the solvent, and the long-term stability of MOFs in DMF could be proved in Fig. S6-S7.

### **Sensing of cations and anions.**

The as-synthesized **CUST-751** and **CUST-752** were finely ground for sensing tests.

For each test, a ground sample (2 mg) was dispersed into different DMF solutions (2 mL, 1.0 mmol·L<sup>-1</sup>) containing M(NO<sub>3</sub>)<sub>x</sub> (M = Al<sup>3+</sup>, Ba<sup>2+</sup>, Ca<sup>2+</sup>, Cd<sup>2+</sup>, Cr<sup>3+</sup>, Cu<sup>2+</sup>, Co<sup>2+</sup>, K<sup>+</sup>, Hg<sup>2+</sup>, Mg<sup>2+</sup>, Na<sup>+</sup>, Ni<sup>2+</sup>, Zn<sup>2+</sup> and Fe<sup>3+</sup>) or KX (X = F<sup>-</sup>, Cl<sup>-</sup>, Br<sup>-</sup>, I<sup>-</sup>, CH<sub>3</sub>COO<sup>-</sup>, H<sub>2</sub>PO<sub>4</sub><sup>-</sup>, BrO<sub>3</sub><sup>-</sup>, OH<sup>-</sup>, CO<sub>3</sub><sup>2-</sup>, HPO<sub>4</sub><sup>2-</sup>, CrO<sub>4</sub><sup>2-</sup>, and Cr<sub>2</sub>O<sub>7</sub><sup>2-</sup>). DMF suspensions of **CUST-751** and **CUST-752** were obtained by ultrasound for 30 min. The anti-interference experiments were carried out to verify the sensitivity in the presence of Fe<sup>3+</sup> and other interfering metal ions with an equal concentration in DMF (1.0 mmol·L<sup>-1</sup>).

### **Sensing of nitroaromatic explosives.**

Dissolve the analyte in DMF and prepare it into a solution with different concentrations. Then take 2 mL of the solution and add it into the sample tube containing 2 mg of crystal powder. After ultrasonic treatment for 30 min, disperse it evenly and form a stable suspension. Let it stand for 1 min. Test it by fluorescence spectrometer to check the quenching condition of the material. Check the selective quenching of different analytes according to the quenching condition of the material.

### **Computational details.**

The fluorescence quenching was analyzed using the Stern-Volmer equations:

$$I_0/I = 1 + K_{SV} [M]$$

where I<sub>0</sub> and I are the fluorescence intensity, in the absence and presence of analyte, respectively, K<sub>SV</sub> is the Stern-Volmer quenching constant and [M] is the concentration of analyte.

The quenching percentage was calculated using the equation as follows:

$$\text{Fluorescence quenching\%} = (1 - I/I_0) \times 100\%$$

where I<sub>0</sub> is the initial fluorescence intensity in the absence of metal ions, I is the fluorescence intensity in the presence of corresponding analyte.

The limit of detection concentration (LOD) was calculated according to the formula:

$$\text{LOD} = 3\sigma / K_{SV}$$

and σ is the standard deviation of the detection method.

### **Recyclable luminescence experiments.**

After the first fluorescence detection of various analytes, the powder samples of

CUST-751 and CUST-752 were recovered by centrifugation and washed by DMF. After drying, the samples collected were used again for the detection of various analytes.

**Table S1.** Selected bond length (Å) for CUST-751.

| Bond                | length (Å) | Bond                | length (Å) |
|---------------------|------------|---------------------|------------|
| Zn1-O8              | 2.018(16)  | Zn2-O2              | 1.94(2)    |
| Zn1-O10             | 2.229(19)  | Zn2-N5              | 1.922(13)  |
| Zn1-N6              | 1.990(13)  | Zn3-O12             | 1.969(17)  |
| Zn1-N15             | 1.985(12)  | Zn3-O11             | 2.131(17)  |
| Zn1-N1 <sup>1</sup> | 2.15(2)    | Zn3-N11             | 1.943(13)  |
| Zn2-O3              | 1.91(2)    | Zn3-N10             | 1.976(13)  |
| Zn2-O1              | 1.99(2)    | Zn3-N3 <sup>2</sup> | 2.3(2)     |

Symmetry transformations used to generate equivalent atoms: <sup>1</sup>1+X, +Y, -1+Z; <sup>2</sup>1-X, -1/2+Y, 1-Z; <sup>3</sup>-1+X, +Y, 1+Z; <sup>4</sup>1-X, 1/2+Y, 1-Z.

**Table S2.** Selected bond length (Å) for CUST-752.

| Bond                | length (Å) | Bond                | length (Å) |
|---------------------|------------|---------------------|------------|
| Cd1-O1 <sup>1</sup> | 2.490(4)   | Cd2-O5 <sup>3</sup> | 2.355(5)   |
| Cd1-O2              | 2.481(4)   | Cd2-O5              | 2.355(5)   |
| Cd1-O3 <sup>3</sup> | 2.265(4)   | Cd2-O6 <sup>4</sup> | 2.356(4)   |
| Cd1-N1              | 2.223(4)   | Cd2-O6 <sup>5</sup> | 2.356(4)   |
| Cd1-O4              | 2.250(4)   | Cd2-N5 <sup>3</sup> | 2.238(5)   |
| Cd1-O7              | 2.363(4)   | Cd2-N5              | 2.238(5)   |

Symmetry transformations used to generate equivalent atoms: <sup>1</sup>2-X, 1-Y, 1-Z; <sup>2</sup>+X, 1+Y, +Z; <sup>3</sup>-X, 2-Y, 2-Z; <sup>4</sup>1-X, 1-Y, 1-Z; <sup>5</sup>-1+X, 1+Y, 1+Z; <sup>6</sup>+X, -1+Y, +Z; <sup>7</sup>1+X, -1+Y, -1+Z.

### Characterizations and results.

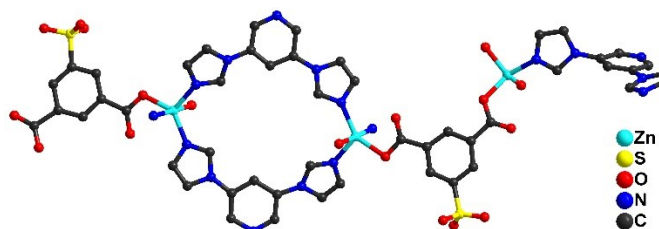

**Fig. S1** Asymmetric unit of CUST-751 (all hydrogen atoms are omitted for clarity).

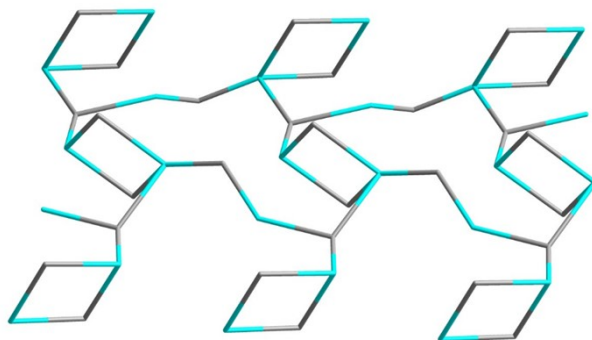

**Fig. S2** The cluster simplification of **CUST-751** in ToposPro.

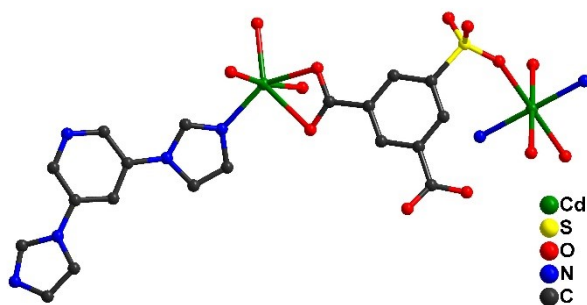

**Fig. S3** Asymmetric unit of **CUST-752** (all hydrogen atoms are omitted for clarity).

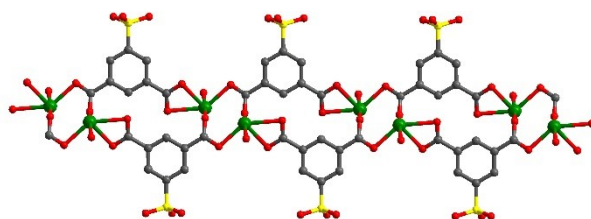

**Fig. S4** 1D chain formed by binuclear  $[\text{Cd}_2(\text{COO})_2]$  units.

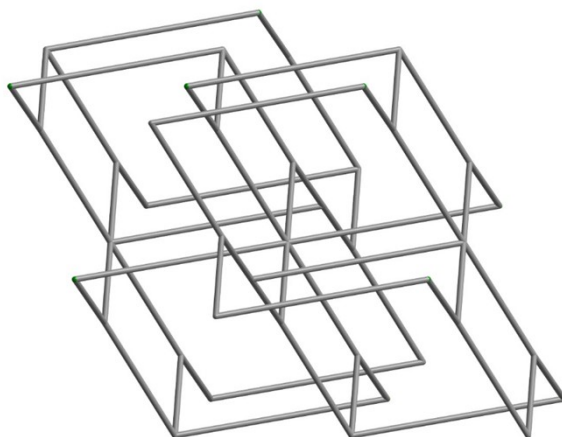

**Fig. S5** The cluster simplification of **CUST-752** in ToposPro.

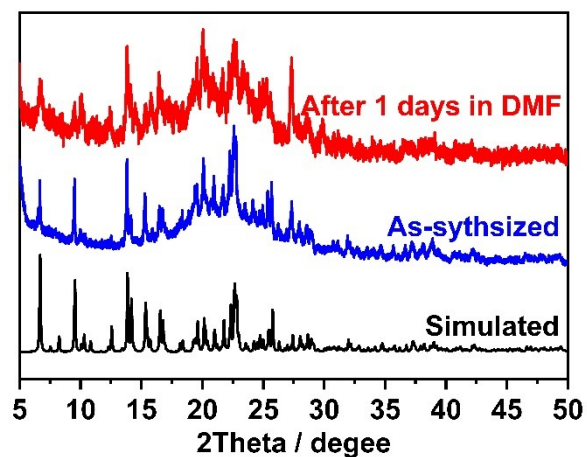

Fig. S6 Powder X-ray diffraction patterns of CUST-751.

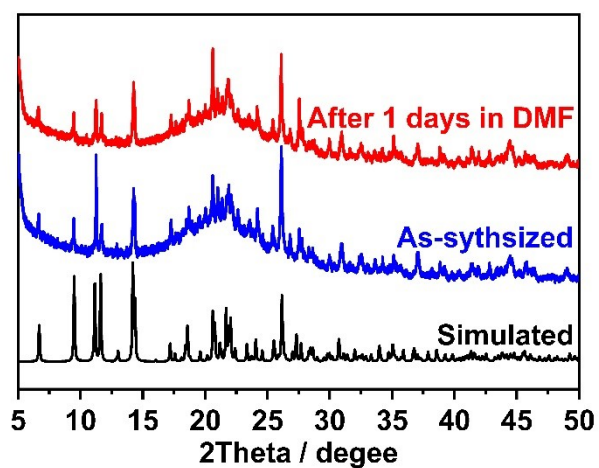

Fig. S7 Powder X-ray diffraction patterns of CUST-752.

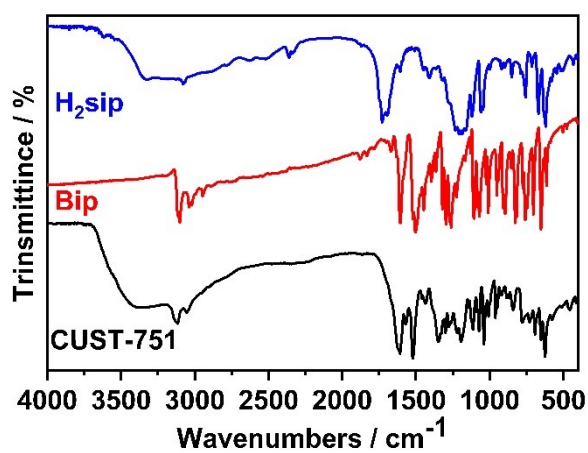

Fig. S8 The IR spectrum of CUST-751, Bip and H<sub>2</sub>sip.

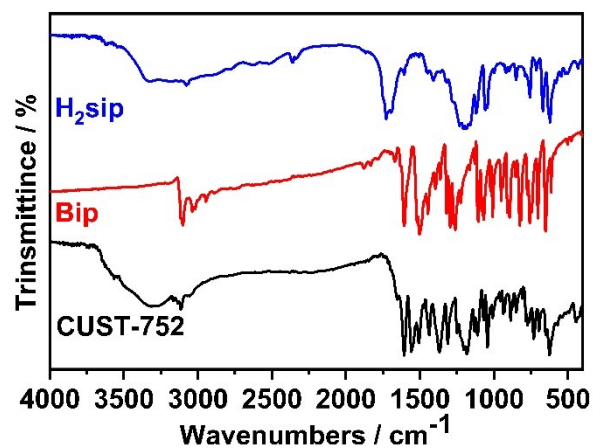

Fig. S9 The IR spectrum of CUST-752, Bip and H<sub>2</sub>sip.

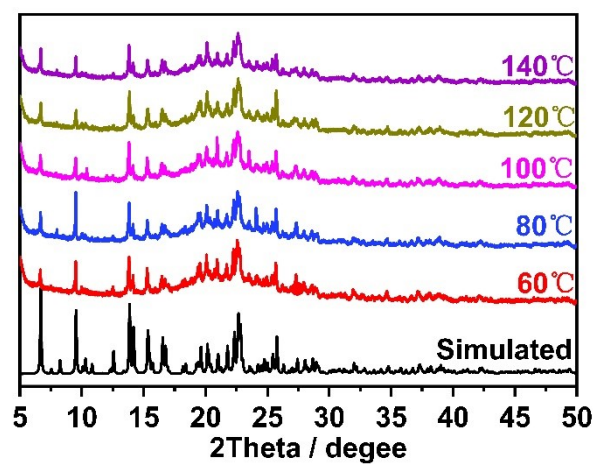

Fig. S10 Variable temperature PXRD patterns of CUST-751.

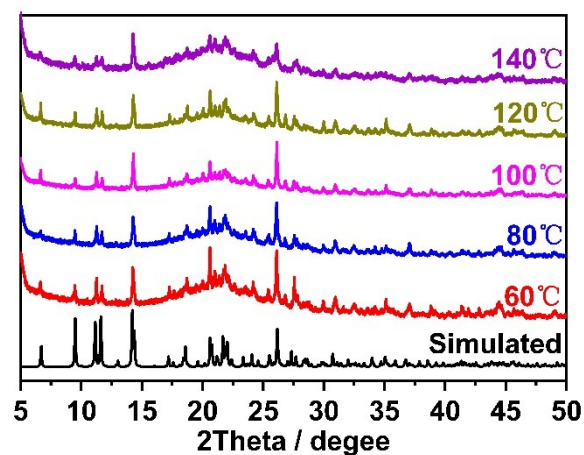

Fig. S11 Variable temperature PXRD patterns of CUST-752.

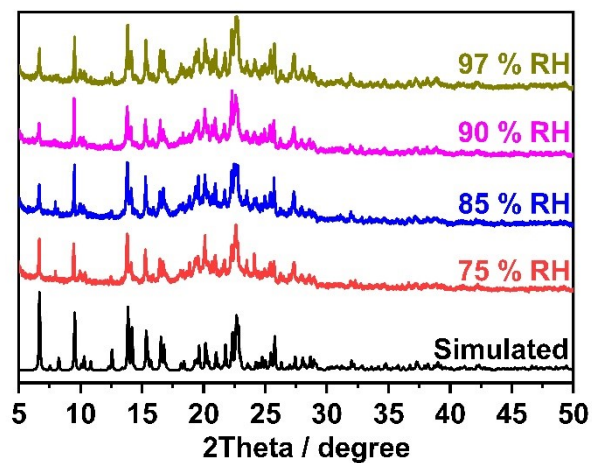

**Fig. S12** PXRD patterns of CUST-751 with different relative humidity.

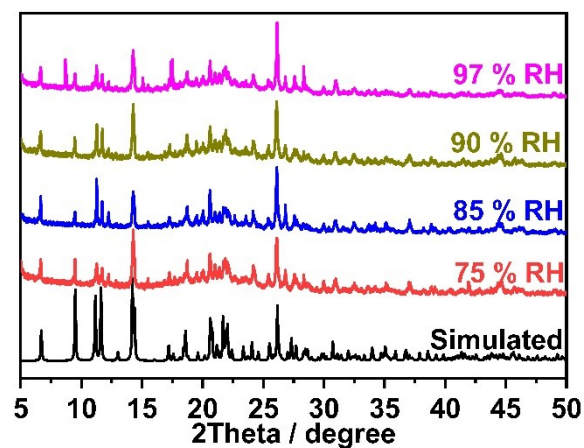

**Fig. S13** PXRD patterns of CUST-752 with different relative humidity.

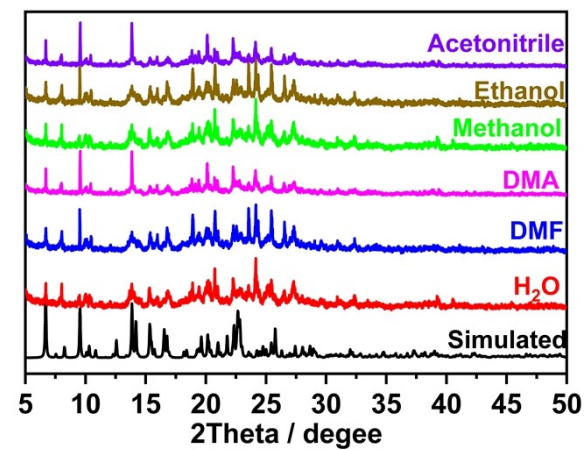

**Fig.S14** The PXRD patterns of CUST-751 in different solvents.



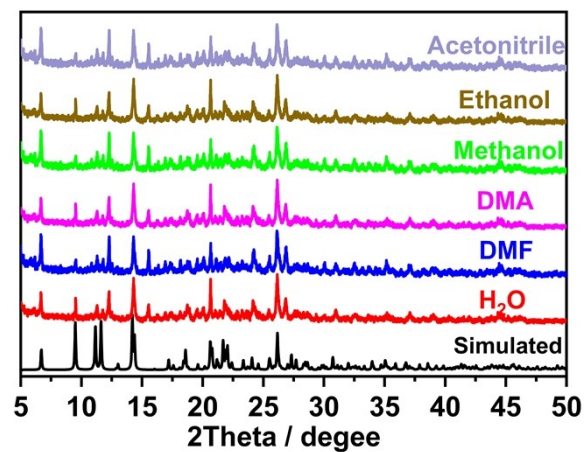

**Fig.S15** The PXR D patterns of CUST-752 in different solvents.

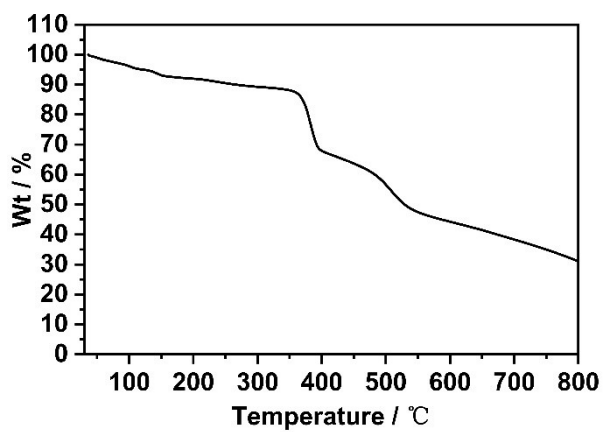

**Fig. S16** TGA curve of CUST-751.

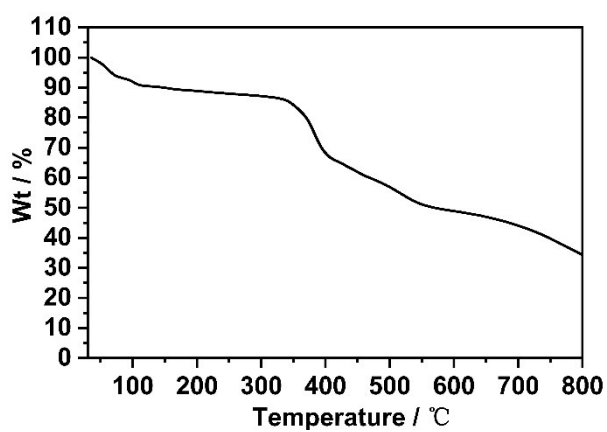

**Fig. S17** TGA curve of CUST-752.

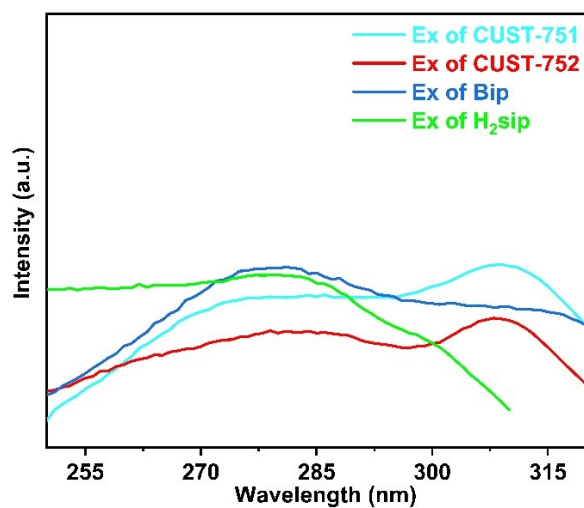

**Fig.S18** The solid-state excitation spectra of free ligands and MOFs.

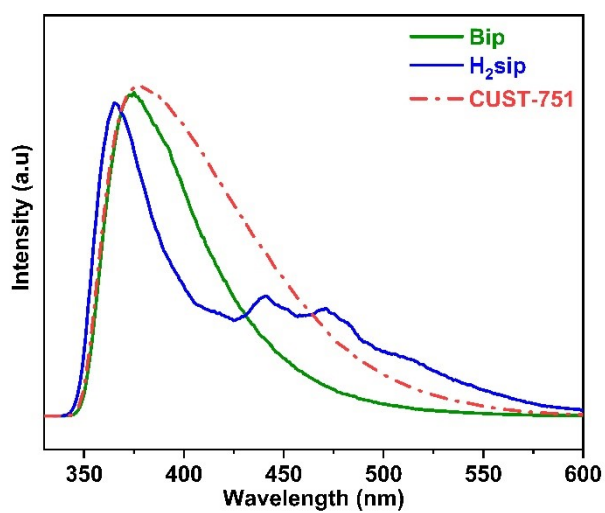

**Fig.S19** Fluorescence emission spectrum of free ligands and CUST-751.

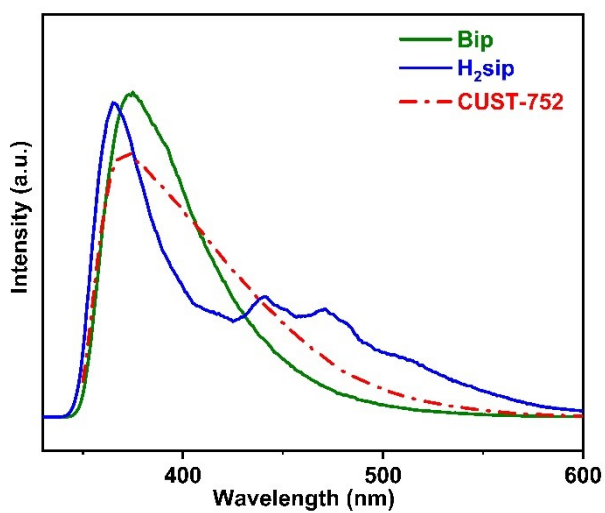

**Fig.S20** Fluorescence emission spectrum of free ligands and CUST-752.

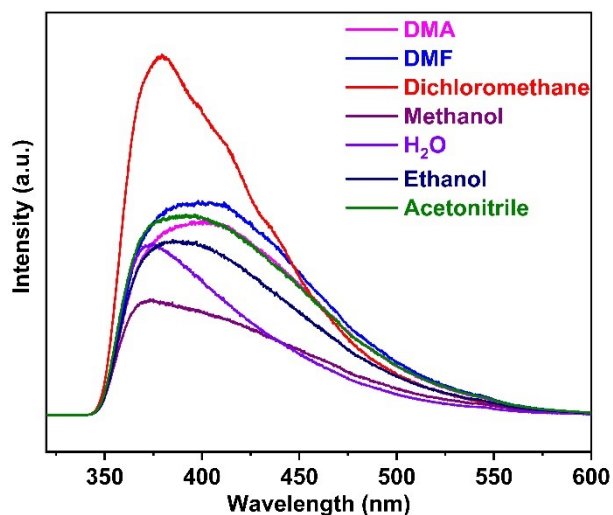

Fig.S21 Photoluminescence spectra of CUST-751 in different solvents.

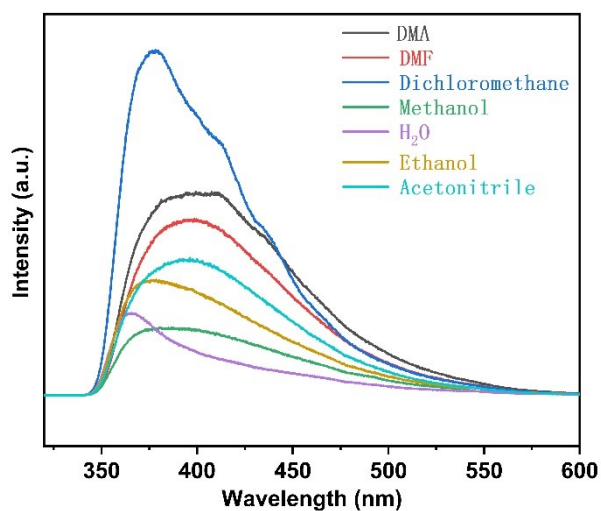

Fig.S22 Photoluminescence spectra of CUST-752 in different solvents.

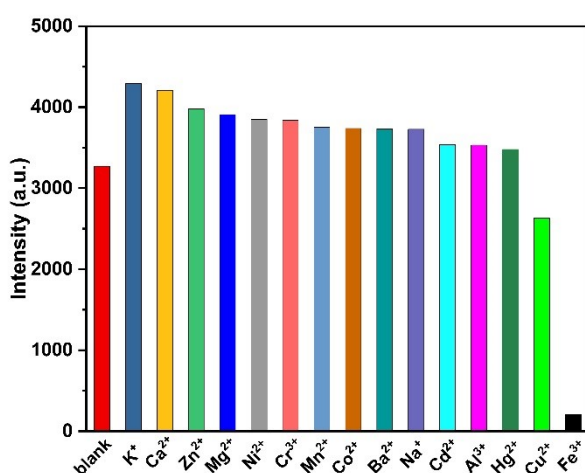

Fig.S23 Emission peak intensity of CUST-751 in the presence of different metal ions.

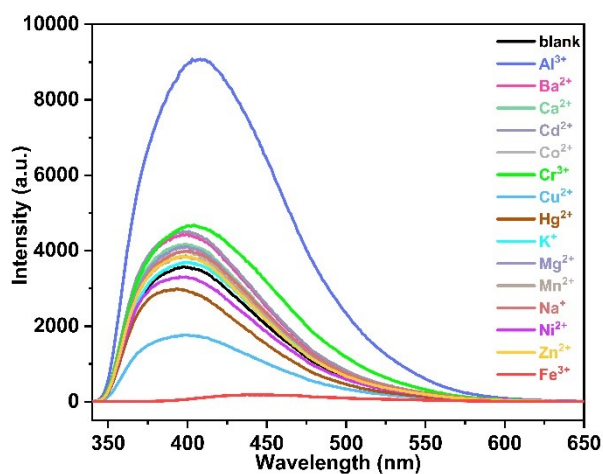

Fig.S24 Emission peak intensity of CUST-752 in the presence of different metal ions.

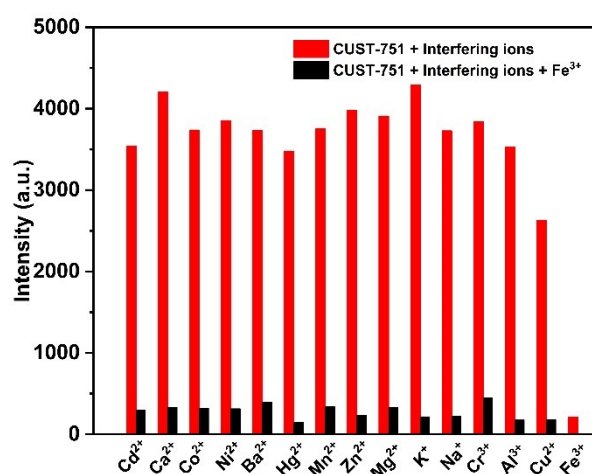

Fig.S25 Selective detection of  $\text{Fe}^{3+}$  for CUST-751 in the presence of other interference cations.

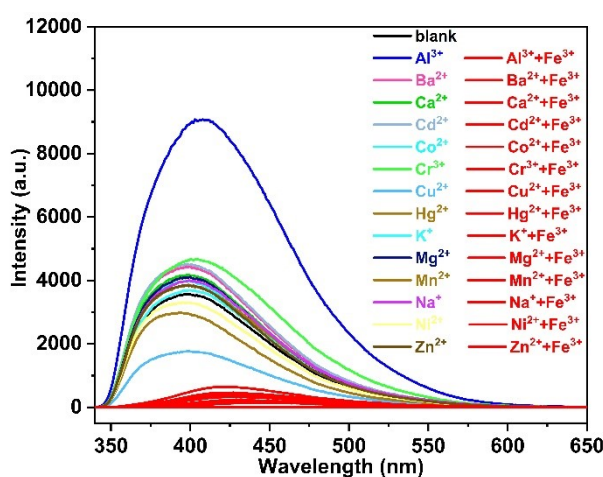

Fig.S26 Selective detection of  $\text{Fe}^{3+}$  for CUST-752 in the presence of other interference cations.

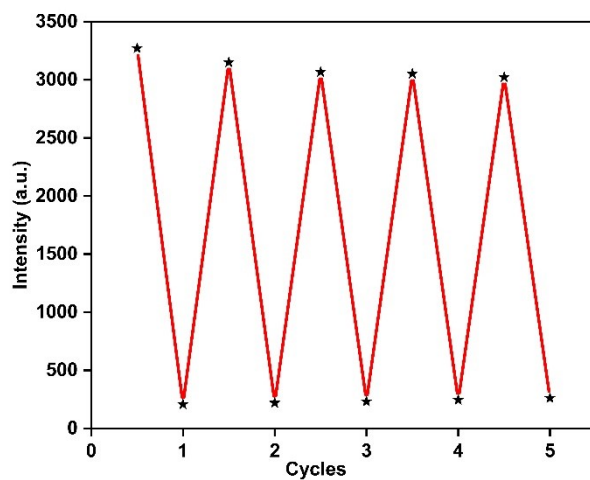

**Fig.S27** Recyclability study for the DMF suspension of **CUST-751** towards the sensing of  $\text{Fe}^{3+}$  ions.

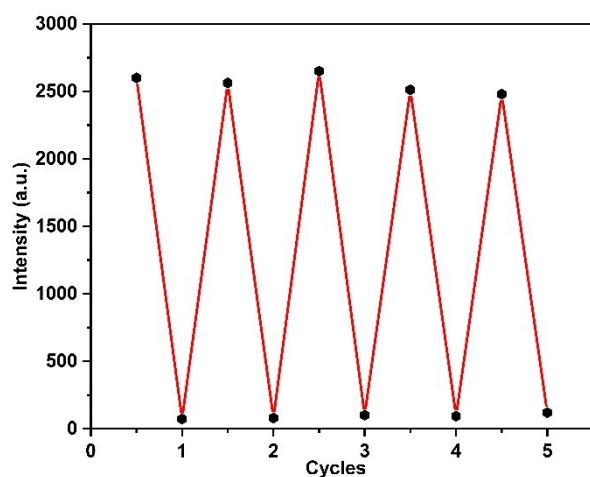

**Fig.S28** Recyclability study for the DMF suspension of **CUST-752** towards the sensing of  $\text{Fe}^{3+}$  ions.

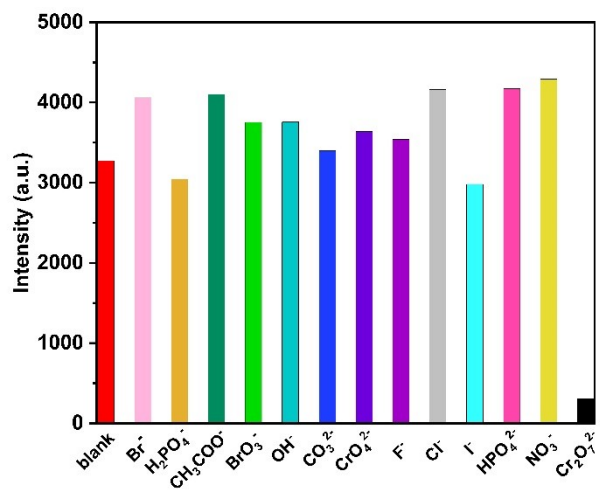

**Fig.S29** Fluorescence intensity response of different anions to **CUST-751**.

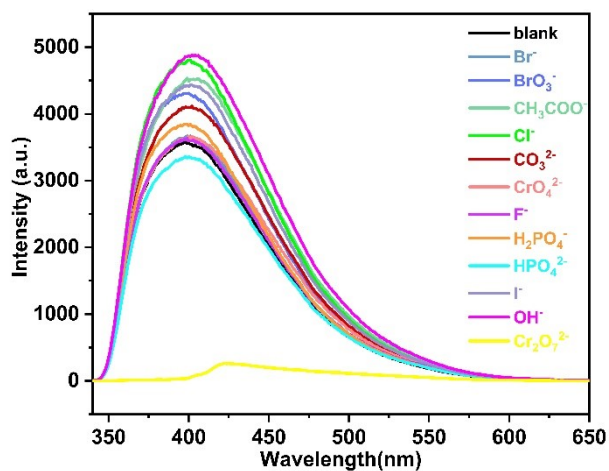

Fig.S30 Fluorescence intensity response of different anions to CUST-752.

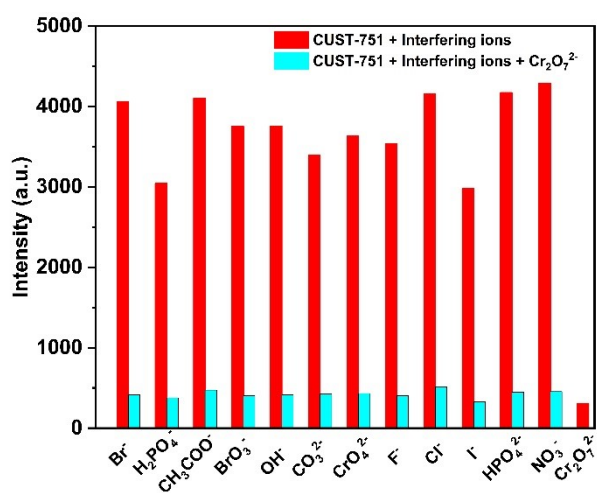

Fig.S31 Fluorescence intensity response of CUST-751 in the presence of Cr<sub>2</sub>O<sub>7</sub><sup>2-</sup> and other anions.

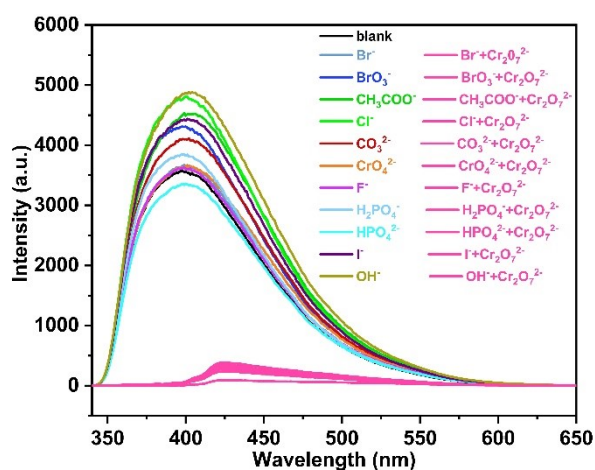

Fig.S32 Fluorescence intensity response of CUST-752 in the presence of Cr<sub>2</sub>O<sub>7</sub><sup>2-</sup> and other anions.

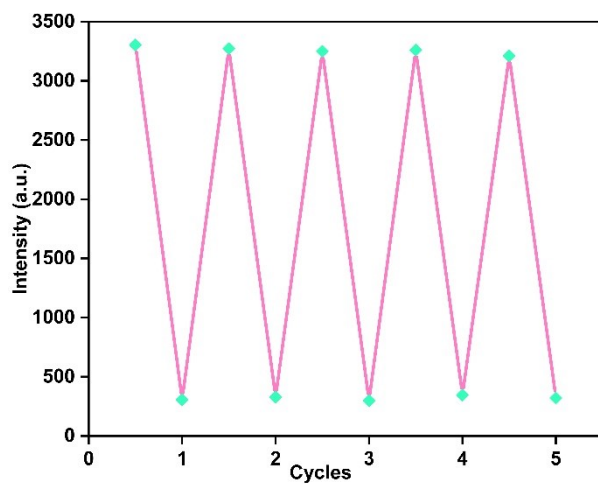

Fig.S33 Five cycle tests of CUST-751 sensing  $\text{Cr}_2\text{O}_7^{2-}$  ions.

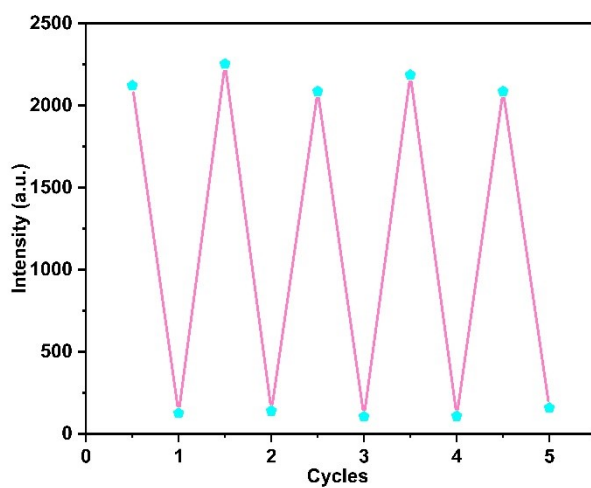

Fig.S34 Five cycle tests of CUST-751 sensing  $\text{Cr}_2\text{O}_7^{2-}$  ions.

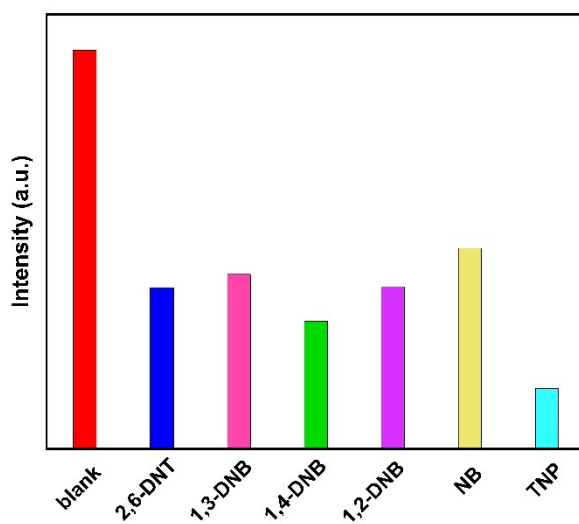

Fig.S35 Fluorescence intensity of CUST-751 in DMF solutions of different nitroaromatic compounds.

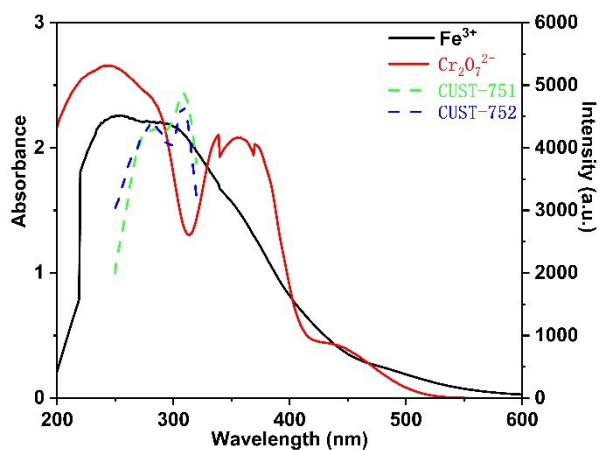

**Fig.S36** UV-vis spectra of quenchers with fluorescence excitation spectra of CUST-751 and CUST-752.

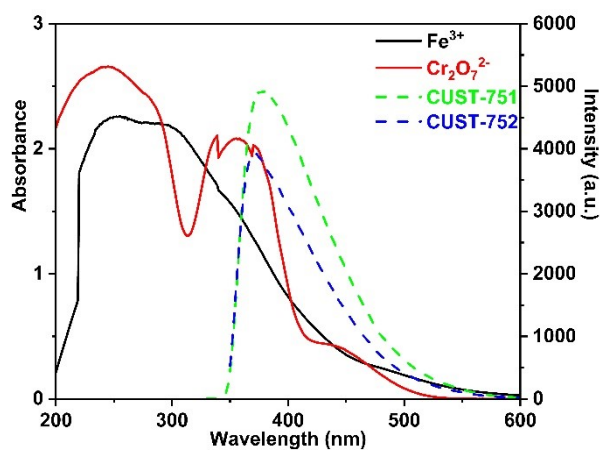

**Fig.S37** UV-vis spectra of quenchers with fluorescence emission spectra of CUST-751 and CUST-752.

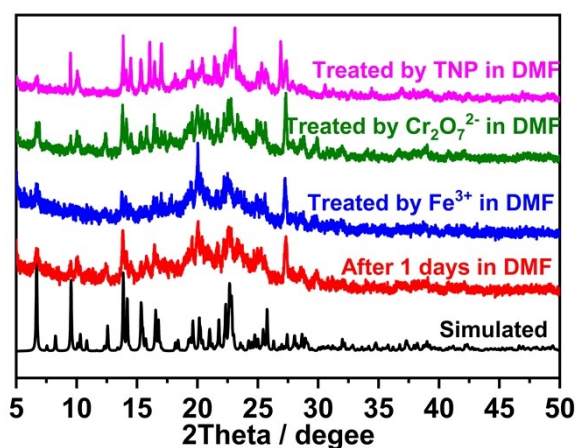

**Fig.S38** PXRD patterns of CUST-751 after immersing in analyte solutions for 24 hours.



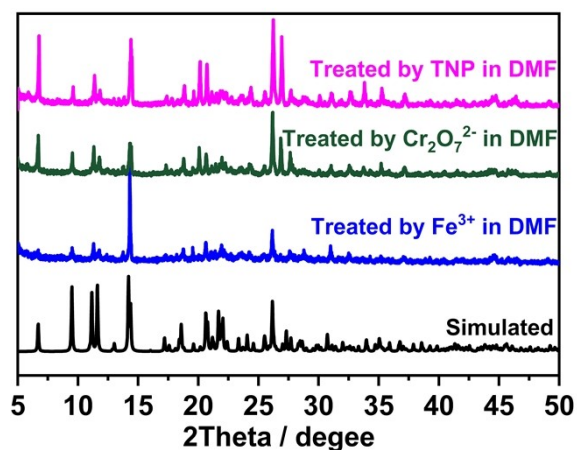

**Fig.S39** PXR D patterns of CUST-752 after immersing in analyte solutions for 24 hours.

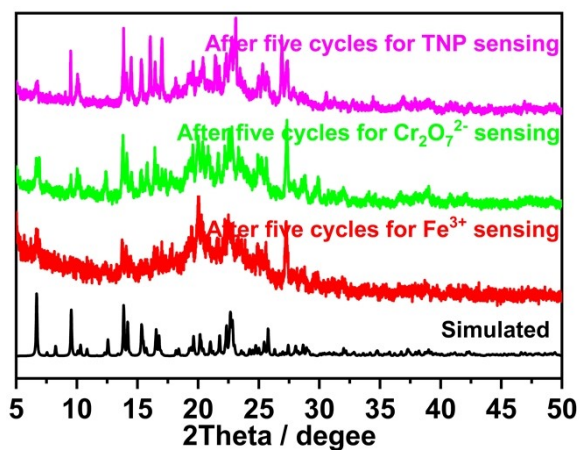

**Fig.S40** PXR D patterns of CUST-751 after five cycles for Fe<sup>3+</sup>, Cr<sub>2</sub>O<sub>7</sub><sup>2-</sup> and TNP sensing.

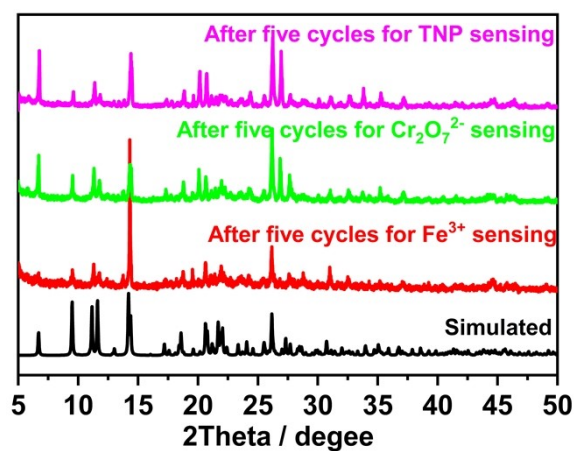

**Fig.S41** PXR D patterns of CUST-752 after five cycles for Fe<sup>3+</sup>, Cr<sub>2</sub>O<sub>7</sub><sup>2-</sup> and TNP sensing.

**Table S3.** A summary of the quenching constant for detecting Fe<sup>3+</sup>/Cr<sub>2</sub>O<sub>7</sub><sup>2-</sup>/TNP.

| MOF                                                                                                                        | Quenching Constant (K <sub>SV</sub> /M <sup>-1</sup> )<br>for Fe <sup>3+</sup> | Quenching Constant (K <sub>SV</sub> /M <sup>-1</sup> )<br>for Cr <sub>2</sub> O <sub>7</sub> <sup>2-</sup> | Quenching Constant (K <sub>SV</sub> /M <sup>-1</sup> )<br>for TNP | Ref.      |
|----------------------------------------------------------------------------------------------------------------------------|--------------------------------------------------------------------------------|------------------------------------------------------------------------------------------------------------|-------------------------------------------------------------------|-----------|
| CUST-751                                                                                                                   | 1.27×10 <sup>4</sup> M <sup>-1</sup>                                           | 1.02×10 <sup>4</sup> M <sup>-1</sup>                                                                       | 3.44×10 <sup>4</sup> M <sup>-1</sup>                              | This work |
| CUST-752                                                                                                                   | 8.92×10 <sup>3</sup> M <sup>-1</sup>                                           | 1.10×10 <sup>4</sup> M <sup>-1</sup>                                                                       | ---                                                               | This work |
| [Zn <sub>3</sub> (dpcp) <sub>2</sub> (1,4'-bmib) <sub>2</sub> ] <sub>n</sub>                                               | 4.06×10 <sup>4</sup> M <sup>-1</sup>                                           | 5.32×10 <sup>4</sup> M <sup>-1</sup>                                                                       | ---                                                               | [2]       |
| [Zn(2-ata)(bidpe)] <sub>n</sub>                                                                                            | 5.27×10 <sup>4</sup> M <sup>-1</sup>                                           | 1.03×10 <sup>5</sup> M <sup>-1</sup>                                                                       | ---                                                               | [2]       |
| [Cd(dbta)] <sub>n</sub>                                                                                                    | 3.47×10 <sup>3</sup> M <sup>-1</sup>                                           | 3.5×10 <sup>3</sup> M <sup>-1</sup>                                                                        | 6.24×10 <sup>3</sup> M <sup>-1</sup>                              | [3]       |
| {[H <sub>2</sub> N(Me) <sub>2</sub> ] <sub>2</sub> [Zn <sub>3</sub> (L) <sub>2</sub> (OH) <sub>2</sub> ·3DMF] <sub>n</sub> | 9.79×10 <sup>4</sup> M <sup>-1</sup>                                           | 1.45×10 <sup>4</sup> M <sup>-1</sup>                                                                       | ---                                                               | [4]       |
| [Zn(L)]·2MeOH·H <sub>2</sub> O                                                                                             | 1.03×10 <sup>4</sup> M <sup>-1</sup>                                           | 1.18×10 <sup>3</sup> M <sup>-1</sup>                                                                       | 3.21×10 <sup>4</sup> M <sup>-1</sup>                              | [5]       |
| [Zn <sub>2</sub> (4,4'-nba) <sub>2</sub> (1,4-bib) <sub>2</sub> ] <sub>n</sub>                                             | 1.68×10 <sup>4</sup> M <sup>-1</sup>                                           | 6.70×10 <sup>3</sup> M <sup>-1</sup>                                                                       | ---                                                               | [6]       |
| [Cd <sub>3</sub> (L) <sub>2</sub> (BDC) <sub>6</sub> (DMF) <sub>2</sub> ]                                                  | 4.04×10 <sup>4</sup> M <sup>-1</sup>                                           | 2.28×10 <sup>4</sup> M <sup>-1</sup>                                                                       | 4.29×10 <sup>4</sup> M <sup>-1</sup>                              | [7]       |
| [Cd <sub>3</sub> (L) <sub>2</sub> (NH <sub>2</sub> -BDC) <sub>6</sub> (DMF) <sub>2</sub> ]                                 | 3.23×10 <sup>4</sup> M <sup>-1</sup>                                           | 2.33×10 <sup>4</sup> M <sup>-1</sup>                                                                       | 3.89×10 <sup>4</sup> M <sup>-1</sup>                              | [7]       |
| [Cd <sub>3</sub> (L) <sub>2</sub> (Br-BDC) <sub>6</sub> (DMF) <sub>2</sub> ]                                               | 5.25×10 <sup>4</sup> M <sup>-1</sup>                                           | 8.18×10 <sup>4</sup> M <sup>-1</sup>                                                                       | 7.57×10 <sup>4</sup> M <sup>-1</sup>                              | [7]       |
| [Eu <sub>2</sub> (HICA)(BTEC)(H <sub>2</sub> O) <sub>2</sub> ] <sub>n</sub>                                                | 2.03×10 <sup>4</sup> M <sup>-1</sup>                                           | 1.14×10 <sup>4</sup> M <sup>-1</sup>                                                                       | ---                                                               | [8]       |
| {[Tb <sub>2</sub> (HICA)(BTEC)(H <sub>2</sub> O) <sub>2</sub> ·2.5H <sub>2</sub> O] <sub>n</sub>                           | 1.20×10 <sup>4</sup> M <sup>-1</sup>                                           | 8.23×10 <sup>3</sup> M <sup>-1</sup>                                                                       | ---                                                               | [8]       |
| {[Zn(IPA)(L)] <sub>n</sub>                                                                                                 | ---                                                                            | 1.37×10 <sup>3</sup> M <sup>-1</sup>                                                                       | 2.16×10 <sup>4</sup> M <sup>-1</sup>                              | [9]       |

## References

- [1]. Z. Pahlevanneshan, M. Moghadam, V. Mirkhani, S. Tangestaninejad, I. Mohammadpoor-Baltork and S. Rezaei, *New J. Chem.*, 2015, **39**, 9729-9734.
- [2]. W. Liu, N. Li, X. Zhang, Y. Zhao, Z. Zong, R. X. Wu, J. P. Tong, C.F. Bi, F. Shao and Yu. H Fan, *Cryst. Growth Des.*, 2021, **21**, 5558–5572.
- [3]. L. Liu, Y. Jia, D. Li and M. Hu, *New J. Chem.*, 2022, **46**, 8636-8643.
- [4]. Y. T. Yan, Y. I. Wu, L. N. Zheng, C. Wei, P. F. Tang, W. P. Wu, W. Y. Zhang and Y. Y.

- Wang, *New J. Chem.*, 2022, **46**, 4292-4299.
- [5]. Q. Sun, K. Yang, W. Ma, L. Zhang and G. Yuan, *Inorg. Chem. Front.*, 2020, **7**, 4387-4395.
- [6]. T. Y. Xu, J. M. Li, Y. H. Han, A. R. Wang, K. H. He and Z. F. Shi, *New J. Chem.*, 2020, **44**, 4011-4022.
- [7]. M. Y. Fan, H. H. Yu, P. Fu, Z. M. Su, X. Li, X. L. Hu, F. W. Gao and Q. Q. Pan, *Dyes Pigm.*, 2021, **185**, 108834.
- [8]. H. Yu, M. Fan, Q. Liu, Z. Su, X. Li, Q. Pan and X. Hu, *Inorg. Chem.*, 2020, **59**, 2005-2010.
- [9]. B. Parmar, Y. Rachuri, K. K. Bisht, R. Laiya and E. Suresh, *Inorg. Chem.*, 2017, **56**, 2627-2638.
